# Supplementary material
Source: PubMed Central journal article supplement (PMC2836974)

## Supplemental information

**Figure S1. Localization of PIP3 in Ras/Rap mutants.** To measure PIP3 levels, the PIP3 detector PHcracGFP was co-expressed in the indicated cell strains. Confocal images are shown for unstimulated cells (left panel) and for cells stimulated with cAMP from a micropipette on the right (right panel).

**Movie S1.** Movie showing the PIP3 detector PHcracGFP expressed in wild-type cells. Cells are stimulated with a micropipette containing  $10^{-4}$  M cAMP; the pipette is placed at the top.

**Movie S2.** Movie showing the PIP3 detector PHcracGFP expressed in GbpD<sup>OE</sup> cells. Cells are stimulated with a micropipette containing  $10^{-4}$  M cAMP from the right.

**Movie S3.** Movie showing the subcellular localization of the Rap1-GTP detector GFP-RBD<sub>RalGDS</sub> expressed in wild-type cells. Cells are stimulated with a micropipette containing  $10^{-4}$  cAMP; the white dot indicates the position of the micropipette.

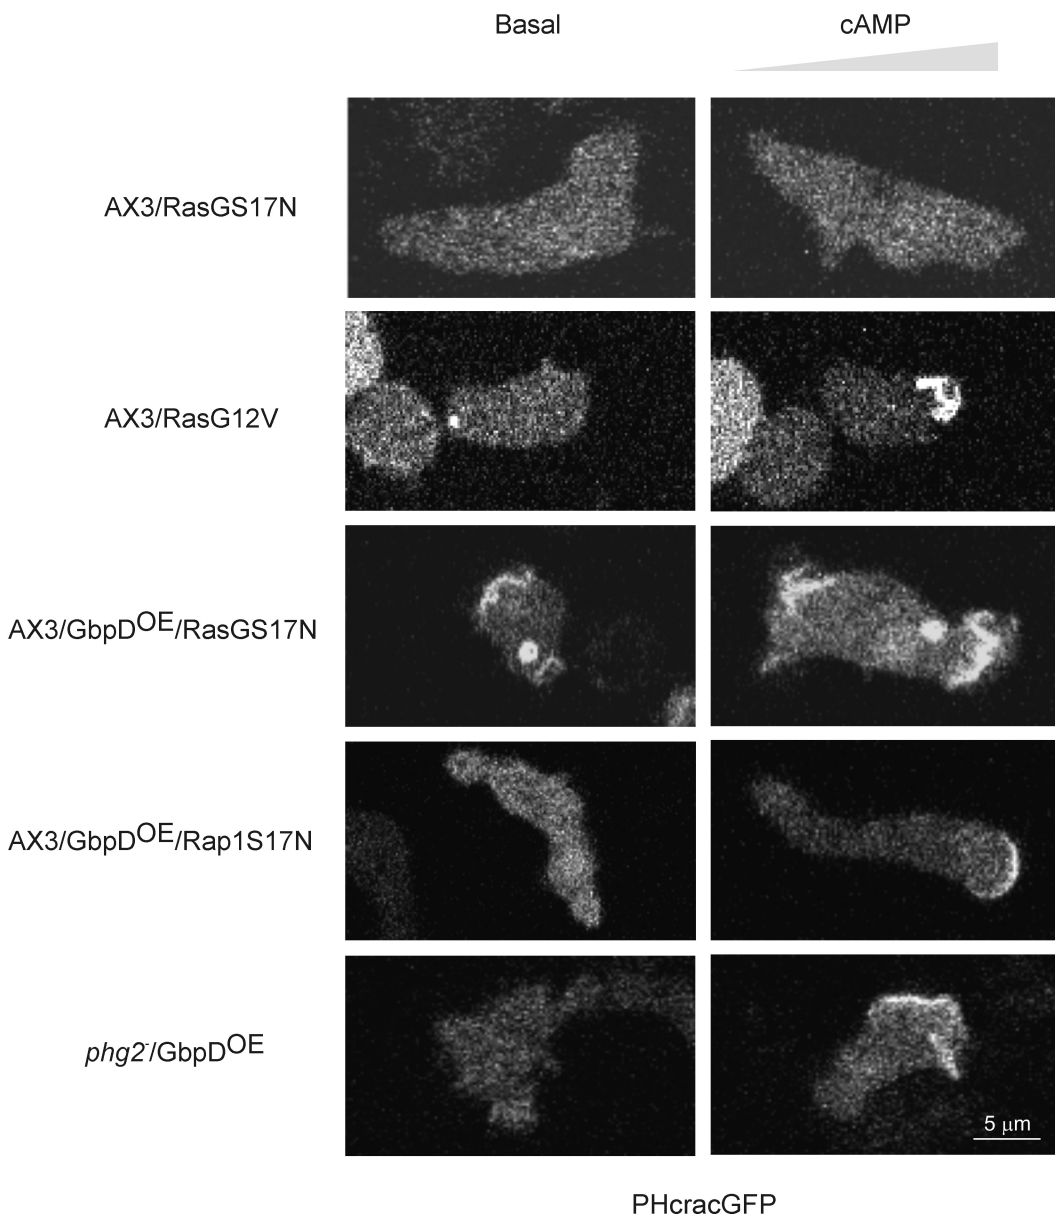

Supplement: E09-03-0177_1.pdf [file E09-03-0177_1.pdf]
